# Supplementary material
Source: PubMed Central journal article supplement (PMC4959487)
Supplement: AEM.03842-15_zam999117080so1.pdf [file AEM.03842-15_zam999117080so1.pdf]

| Number of identified reads according to taxonomic affiliation |                       |                            |                                |                                                                                        | Weld                | Bottom              | Leak           | Blank       |
|---------------------------------------------------------------|-----------------------|----------------------------|--------------------------------|----------------------------------------------------------------------------------------|---------------------|---------------------|----------------|-------------|
| <b>Total Bacteria</b>                                         |                       |                            |                                |                                                                                        | 17694               | 102810              | 20084          | 6562        |
|                                                               | <i>Proteobacteria</i> | <i>Deltaproteobacteria</i> | <i>Desulfovibrionales</i>      | <i>Desulfovibrio</i> sp.<br>Other <i>Desulfovibrio</i> sp.                             | 14578<br>138        | 71394<br>142        | 9159<br>880    | -<br>-      |
|                                                               |                       |                            | <i>Desulfuromonadales</i>      | <i>Desulfonauticus</i> sp.                                                             | 6                   | -                   | 528            | -           |
|                                                               |                       |                            | <i>Desulfobacteriales</i>      | <i>Pelobacter</i> sp.<br><i>Desulfobacteraceae</i>                                     | 1336<br>8           | 8844<br>71          | 2466<br>530    | -<br>-      |
|                                                               |                       | <i>Gammaproteobacteria</i> | <i>Oceanospirillales</i>       | <i>Oceanospirillaceae</i>                                                              | 4                   | 36                  | 1233           | -           |
|                                                               |                       |                            | <i>Alteromonadales</i>         | <i>Marinobacter</i> sp.                                                                | 5                   | 71                  | 705            | -           |
|                                                               |                       |                            | <i>Pseudomonadales</i>         | <i>Pseudomonas</i> sp.                                                                 | 130                 | 13837               | 1056           | -           |
|                                                               |                       |                            | <i>Xanthomonadales</i>         | <i>Xanthomonas</i> sp.                                                                 | 2                   | -                   | -              | 185         |
|                                                               |                       |                            | <i>Enterobacteriales</i>       | <i>Enterobacteriaceae</i>                                                              | -                   | -                   | -              | 145         |
|                                                               |                       | <i>Alphaproteobacteria</i> | <i>Rhodospirillales</i>        | <i>Rhodospirillaceae</i>                                                               | 526                 | 2211                | 180            | -           |
|                                                               |                       |                            | <i>Rhizobiales</i>             | <i>Phyllobacterium</i> sp.                                                             | -                   | -                   | -              | 154         |
|                                                               |                       | <i>Betaproteobacteria</i>  | <i>Burkholderiales</i>         |                                                                                        | 66                  | 178                 | 1408           | 6039        |
|                                                               | <i>Firmicutes</i>     | <i>Clostridia</i>          | <i>Clostridiales</i>           | <i>Acetobacterium</i> sp.<br><i>Syntrophomonas</i> sp..                                | 80<br>75            | 2710<br>499         | 704<br>355     | -<br>-      |
|                                                               | <i>Thermotogales</i>  | <i>Thermotogae</i>         | <i>Thermotogales</i>           | <i>Geotoga</i> sp.                                                                     | 491                 | 1248                | 352            | -           |
|                                                               | <i>Unidentified</i>   |                            |                                |                                                                                        | 249                 | 1569                | 528            | 39          |
| <b>Total Archaea</b>                                          |                       |                            |                                |                                                                                        | 57740               | 54116               | 23485          | NA          |
|                                                               | <i>Euryarchaeota</i>  | <i>Methanomicrobia</i>     | <i>Methanobacteriales</i>      | <i>Methanobacterium</i> sp.<br><i>Methanosphaera</i>                                   | 36211<br>8          | 37822<br>3          | 7865<br>-      | -<br>-      |
|                                                               |                       |                            | <i>Methanococcales</i>         | <i>Methanococcus</i> sp.                                                               | 534                 | 308                 | 1              | -           |
|                                                               |                       |                            | <i>Methanomicrobiales</i>      | <i>Methanoplanus</i> sp.<br>Other                                                      | -<br>354            | 2<br>104            | -<br>6         | -<br>-      |
|                                                               |                       |                            | <i>Methanosarcinales</i>       | <i>Methanosaeata</i> sp.<br><i>Methanolobus</i> sp.<br><i>Methanomethylovorans</i> sp. | 74<br>9680<br>-     | 137<br>10000<br>2   | -<br>84<br>-   | -<br>-<br>- |
|                                                               |                       |                            |                                | <i>Methanosarcina</i> sp.<br>ANME-3<br>Other                                           | 2456<br>4<br>1      | 976<br>5<br>15      | 6393<br>-<br>- | -<br>-<br>- |
|                                                               | <i>Unidentified</i>   | <i>Thermoplasmata</i>      | <i>Methanomassiliicoccales</i> |                                                                                        | 3958<br>4456        | 1416<br>3326        | 7482<br>1654   | -<br>-      |
| <b>Total dsrAB</b>                                            |                       |                            |                                |                                                                                        | 364739              | 25327               | 6226           | NA          |
|                                                               | <i>Proteobacteria</i> | <i>Deltaproteobacteria</i> | <i>Desulfovibrionales</i>      | <i>Desulfovibrio desulfuricans</i> sp.<br>Other <i>Desulfovibrio</i> sp.               | 251035<br>113704    | 17566<br>7761       | 2067<br>4159   | -<br>-      |
| <b>Total mcrA</b>                                             |                       |                            |                                |                                                                                        | 38409               | 35969               | NA             | NA          |
|                                                               | <i>Euryarchaeota</i>  | <i>Methanomicrobia</i>     | <i>Methanomicrobiales</i>      | <i>Methanoplanus</i> sp.<br>Other <i>Methanomicrobiales</i>                            | -<br>20             | 41<br>40            | -<br>-         | -<br>-      |
|                                                               |                       |                            | <i>Methanosarcinales</i>       | <i>Methanosaeata</i> sp.<br><i>Methanolobus</i> sp.<br><i>Methanosarcina</i> sp.       | -<br>24266<br>13282 | 22<br>30710<br>4820 | -<br>-<br>-    | -<br>-<br>- |
|                                                               |                       |                            |                                | Other <i>Methanosarcinales</i>                                                         | 700                 | 256                 | -              | -           |
|                                                               |                       | <i>Thermoplasmata</i>      | <i>Methanomassiliicoccales</i> |                                                                                        | 141                 | 80                  | -              | -           |
